# Supplementary material for: Genomic Insights into the Ancestry and Demographic History of South America
Source: PubMed Central journal article supplement (PMC4670080; doi:10.1371/journal.pgen.1005602), 2015-12-04

# Autosomal Ancestry

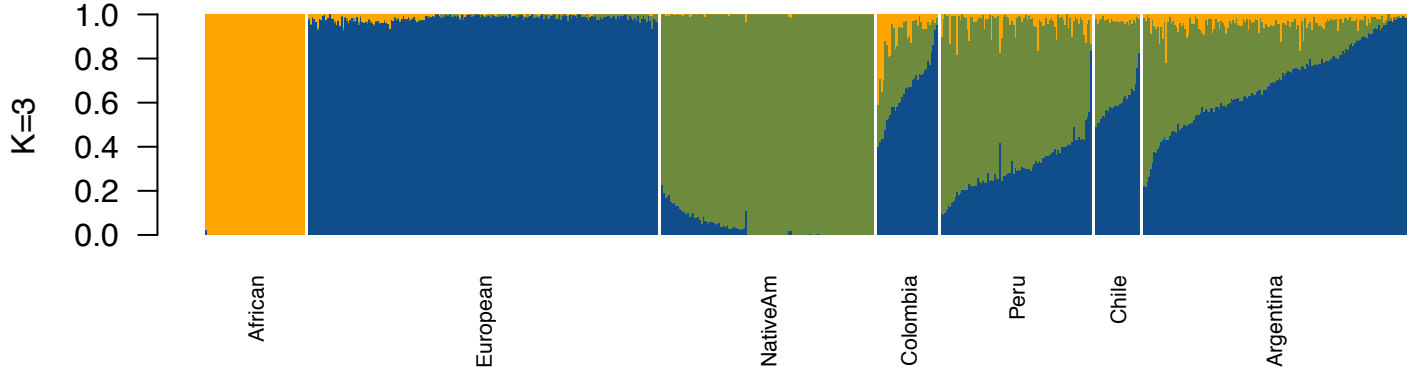

# X-chromosomal Ancestry

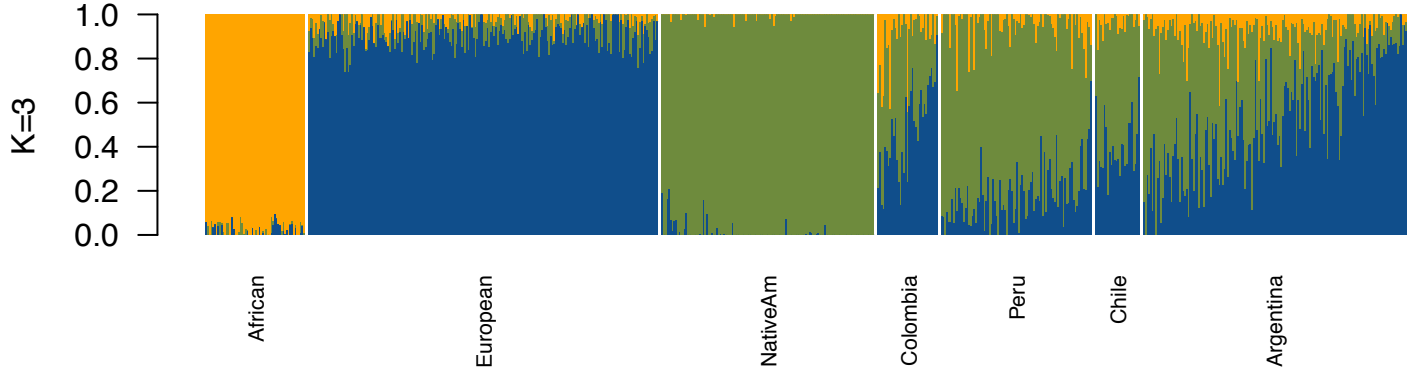

Supplement: pgen.1005602.s007.pdf [file pgen.1005602.s007.pdf]
