# Supplementary material for: Genomic Insights into the Ancestry and Demographic History of South America
Source: PubMed Central journal article supplement (PMC4670080; doi:10.1371/journal.pgen.1005602), 2015-12-04

Proportion of European Ancestry in IBD Tracts in Colombia

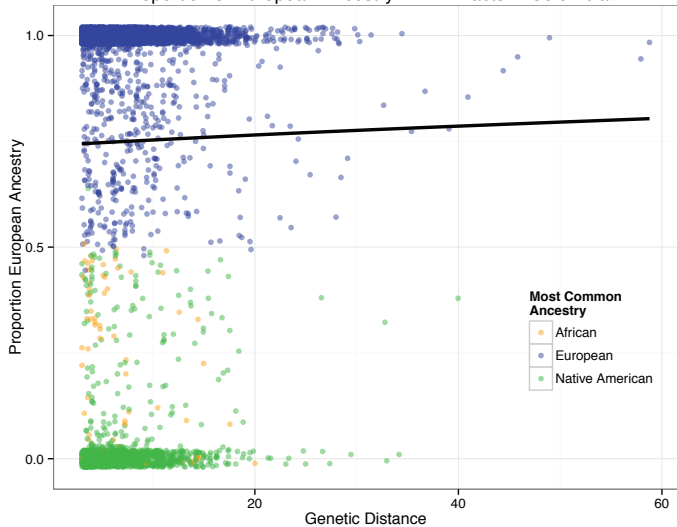

Proportion of European Ancestry in IBD Tracts in Argentina

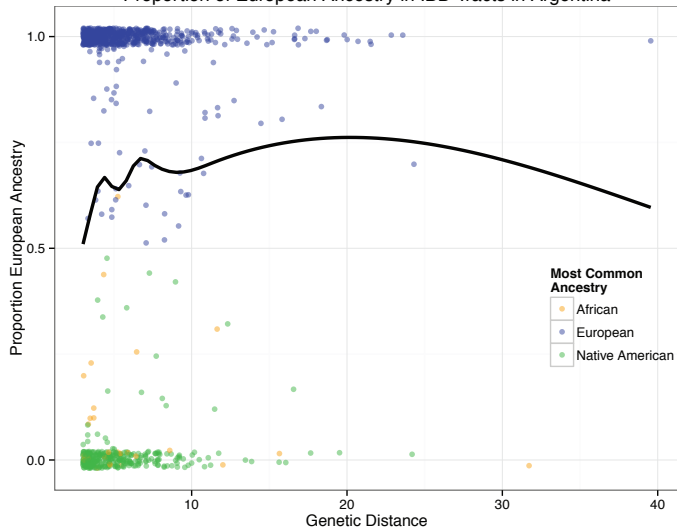

Proportion of European Ancestry in IBD Tracts in Peru

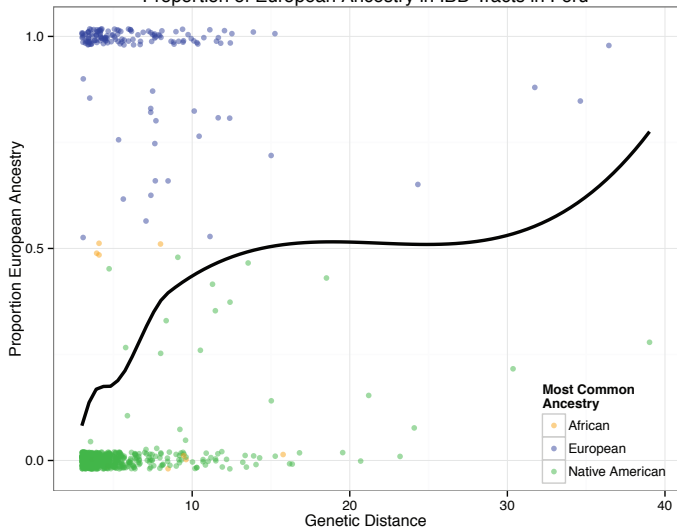

Proportion of European Ancestry in IBD Tracts in Ecuador

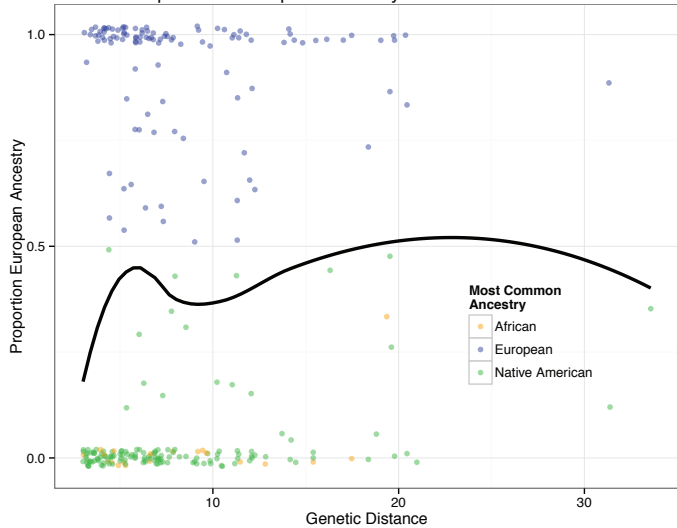

Proportion of European Ancestry in IBD Tracts in Chile

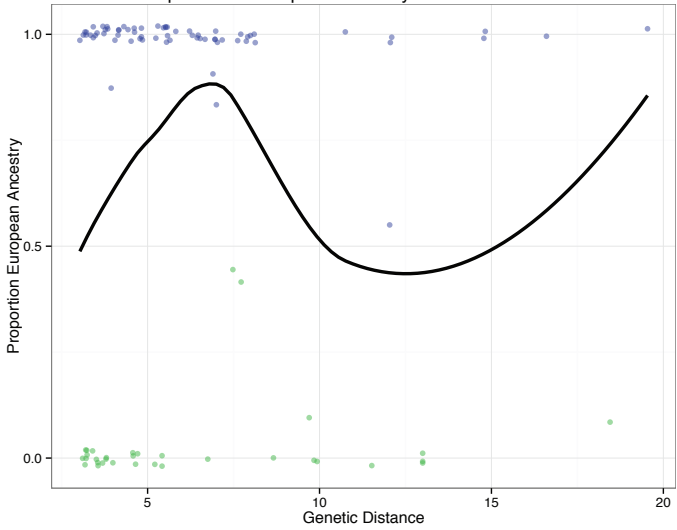

Supplement: pgen.1005602.s021.pdf [file pgen.1005602.s021.pdf]
