# Supplementary material for: Genomic Insights into the Ancestry and Demographic History of South America
Source: PubMed Central journal article supplement (PMC4670080; doi:10.1371/journal.pgen.1005602), 2015-12-04
Supplement: pgen.1005602.s024.pdf [file pgen.1005602.s024.pdf]

### Base Model

European Colonists

African Migration

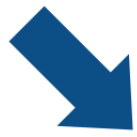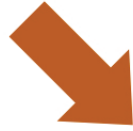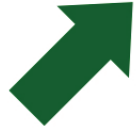

Native Americans

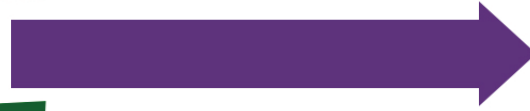

Modern Latinos

### Model with Additional European Migration

European Colonists

African Migration

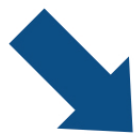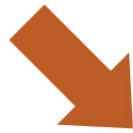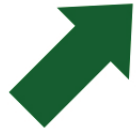

Native Americans

European Migration

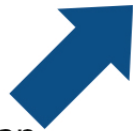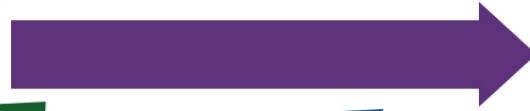

Modern Latinos

### Model with Additional African Migration

European Colonists

African Migration

2nd African Migration

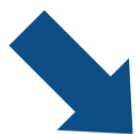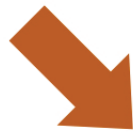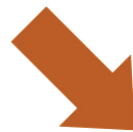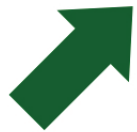

Native Americans

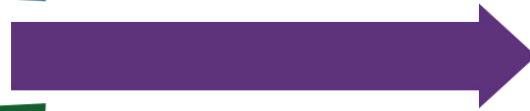

Modern Latinos
