# Supplementary material for: Genomic Insights into the Ancestry and Demographic History of South America
Source: PubMed Central journal article supplement (PMC4670080; doi:10.1371/journal.pgen.1005602), 2015-12-04
Supplement: pgen.1005602.s028.pdf [file pgen.1005602.s028.pdf]

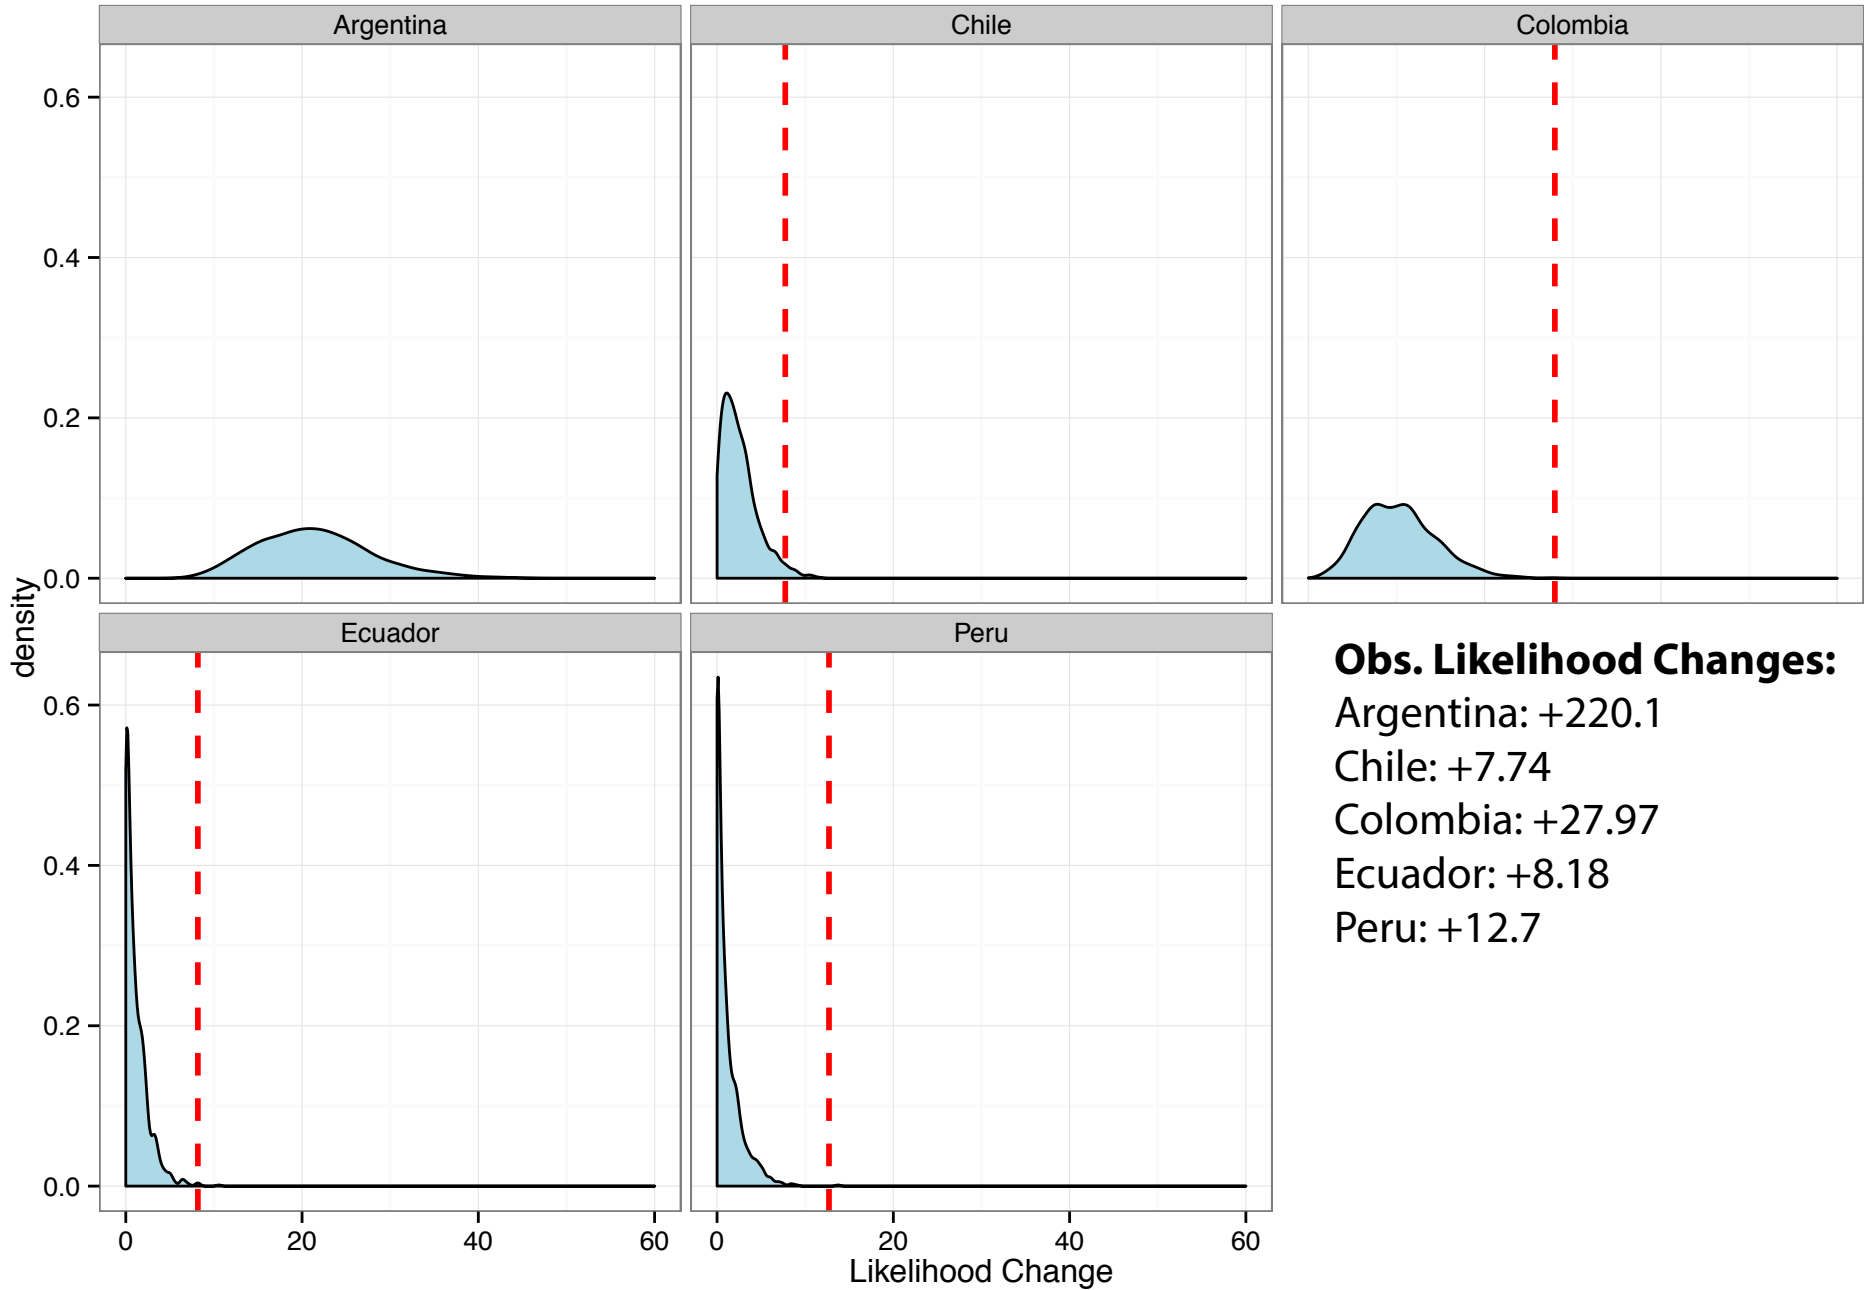

**Obs. Likelihood Changes:**  
Argentina: +220.1  
Chile: +7.74  
Colombia: +27.97  
Ecuador: +8.18  
Peru: +12.7
