# Supplementary material for: Genomic Insights into the Ancestry and Demographic History of South America
Source: PLoS Genet. 2015 Dec 4;11(12):e1005602. doi: 10.1371/journal.pgen.1005602 (PMC4670080; doi:10.1371/journal.pgen.1005602)
Supplement: S3 Table — Likelihoods, BIC, simulated p-values, and migration parameters for each of the Tracts models tested. (XLSX) [file pgen.1005602.s035.xlsx]

## Sheet: Sheet1
Model	Argentina	Peru	Chile	Colombia	Ecuador
Base L	-649.61	-423.2	-197.86	-327.93	-212.83
Base BIC	1309.29	855.924	402.312	664.968	431.549
Eur. Migration L	-427.54	-410.5	-190.12	-299.96	-204.65
Eur. Migration BIC	875.228	840.049	393.423	618.136	421.078
Afr. Migration L	-649.61	-423.2	-197.37	-327.93	-212.83
Afr. Migration BIC	1319.37	865.449	407.923	674.076	437.438
Number of Individuals	154	117	27	95	19
Change in Likelihood	222.07	12.7	7.74	27.97	8.18
Simulated P-value	< 0.001	0.002	0.027	< 0.0001	0.003
Earliest Migration Time (European Pulse Model)	11	9	14	11	12
Migration Time Parameter	10.21	8.97	13.87	10.8	11.65
Second European Pulse Time	3.84	3.19	8.53	4.04	8.95
