# Supplementary material for: Genomic Insights into the Ancestry and Demographic History of South America
Source: PLoS Genet. 2015 Dec 4;11(12):e1005602. doi: 10.1371/journal.pgen.1005602 (PMC4670080; doi:10.1371/journal.pgen.1005602)
Supplement: S5 Table — (XLSX) [file pgen.1005602.s037.xlsx]

## Sheet: HospitalSamplingLocations.csv
Hospital	Type	Country	City	NumberOfIndividuals
Hospital_General_de_Agudos_Dr_E_Tornu	Public	Argentina	Buenos_Aires	1
Hospital_Italiano_de_Buenos_Aires	Private	Argentina	Buenos_Aires	2
Hospital_Fernandez	Public	Argentina	Buenos_Aires	9
Hospital_de_Clinicas_Jose_San_Martin	Public	Argentina	Buenos_Aires	12
CEMIC	Public	Argentina	Buenos_Aires	38
Clinica_Privada_del_Sol	Private	Argentina	Cordoba	3
Hospital_Cordoba	Public	Argentina	Cordoba	14
Hospital_Nacional_de_Clinicas	Public	Argentina	Cordoba	18
Hospital_Interzonal_de_Agudos_Dr_Oscar_Allende	Public	Argentina	Mar_del_Plata	19
Hospital_Central	Public	Argentina	Mendoza	13
Hospital_San_Martin	Public	Argentina	Parana	1
Sanatorio_de_Ninos	Private	Argentina	Rosario	1
Hospital_Provincial_del_Centenario	Public	Argentina	Rosario	6
Hospital_Provincial_del_Rosario	Public	Argentina	Rosario	8
Hospital_Provincial_Dr_Jose_Maria_Cullen	Public	Argentina	Santa_Fe	12
Hospital_Jose_Bernardo_Iturraspe	Public	Argentina	Santa_Fe	18
Hospital_Clinico_Universidad_de_Chile	Public	Chile	Santiago	11
Hospital_San_Juan_de_Dios	Public	Chile	Santiago	16
Hospital_Nacional_Guillermo_Almenara_Irigoyen	Public	Peru	Lima	64
